# Supplementary material
Source: PubMed Central journal article supplement (PMC3245882)
Supplement: NIHMS335212-supplement-2.pdf [file NIHMS335212-supplement-2.pdf]

**Supplementary Material to Higashi et al. “Photochemical preparation of a novel low molecular weight heparin”**

**Supplemental figure 1. Polyacrylamide gel electrophoresis of LMWHs.**

Lanes contain: a. controlled heparinase depolymerization of bovine lung heparin; b. pLMWH; c, RD heparin; d, OP2123; e, Logiparin; and f. Enoxaparin. 5  $\mu\text{g}$  of controlled heparinase depolymerization of bovine lung heparin (a) and 7.5  $\mu\text{g}$  LMWHs (b-f) were separated by PAGE on a 22% acrylamide gel and stained with 0.5% (w/v) Alcian blue in 2% (v/v) acetic acid aqueous solution.
